# Supplementary material
Source: ML conference proceedings conference paper supplement (https://openreview.net/forum?id=S92QnVEzQP)
Supplement: supplementary_material [file attachment]

---

# VURF: A General-purpose Reasoning and Self-refinement Framework for Video Understanding

---

Ahmad Mahmood<sup>1</sup>  
amahmood@ethz.ch

Ashmal Vayani<sup>2</sup>

Muzammal Naseer<sup>3</sup>

Salman Khan<sup>4,5</sup>

Fahad Shahbaz Khan<sup>4,6</sup>

<sup>1</sup>ETH Zurich   <sup>2</sup>University of Central Florida   <sup>3</sup>Khalifa University, UAE

<sup>4</sup>Mohamed Bin Zayed University of AI, UAE   <sup>5</sup>Australian National University, Australia

<sup>6</sup>Linköping University, Sweden

## 1 Dataset Specific Prompts

We curated in-context examples for 4 different datasets (NeXTQA, STAR, Social-IQ, and TrafficQA). The prompts for two of the datasets are shown in Figure 4. We show 3 in-context examples for each prompt.

|                                                                                                                                                                                                                                                                                                                                                                                                                                                                                                                                                                                                                                                                                                                                                                                                                                                                                          |                                                                                                                                                                                                                                                                                                                                                                                                                                                                                                                                                                                                                                                                                                                           |
|------------------------------------------------------------------------------------------------------------------------------------------------------------------------------------------------------------------------------------------------------------------------------------------------------------------------------------------------------------------------------------------------------------------------------------------------------------------------------------------------------------------------------------------------------------------------------------------------------------------------------------------------------------------------------------------------------------------------------------------------------------------------------------------------------------------------------------------------------------------------------------------|---------------------------------------------------------------------------------------------------------------------------------------------------------------------------------------------------------------------------------------------------------------------------------------------------------------------------------------------------------------------------------------------------------------------------------------------------------------------------------------------------------------------------------------------------------------------------------------------------------------------------------------------------------------------------------------------------------------------------|
| <pre>... Think step by step to answer the question. Question: What did the person do with the ball? Program: TRACK0=TRACK(video=VIDEO, query="person", max_tracks=1) TRACK1=TRACK(video=VIDEO, query="ball", max_tracks=1) TRACK2=MERGE(track1=TRACK0, track2=TRACK1) VID0=CROP(video=VIDEO, track=TRACK2) ANSWER=VQA(video=VID0, query="What did the person do with the ball?") FINAL_RESULT=RESULT(var=ANSWER)  Question: What will the person do next with the sofa? Program: SUMMARY=SUMMARIZE(video=VIDEO) ANSWER=PREDICT(summary=SUMMARY, query="What will the person do next with the sofa?") FINAL_RESULT=RESULT(var=ANSWER)  Question: What did the person do to the paper after opening the bag? Program: ANSWER=VQA(video=VIDEO, query="What did the person do to the paper after opening the bag?") FINAL_RESULT=RESULT(var=ANSWER)  Question: {question} Program: ...</pre> | <pre>... Think step by step to answer the question. Question: Where was the video taken? Program: VID0=TRIM(video=VIDEO, start=0.3, end=0.7) ANSWER=VQA(video=VID0, query="Where is this video taken?") FINAL_RESULT=RESULT(var=ANSWER)  Question: What's the condition of the road? Program: TRACK0=TRACK(video=VIDEO, query="road", max_tracks=1) VID0=CROP(video=VIDEO, track=TRACK0) ANSWER=VQA(video=VID0, query="What is the condition of the road?") FINAL_RESULT=RESULT(var=ANSWER)  Question: How many vehicles appeared in this video? Program: TRACK0=TRACK(video=VIDEO, query="vehicle", max_tracks=1000) ANSWER=COUNT(track=TRACK0) FINAL_RESULT=RESULT(var=ANSWER)  Question: {question} Program: ...</pre> |
|------------------------------------------------------------------------------------------------------------------------------------------------------------------------------------------------------------------------------------------------------------------------------------------------------------------------------------------------------------------------------------------------------------------------------------------------------------------------------------------------------------------------------------------------------------------------------------------------------------------------------------------------------------------------------------------------------------------------------------------------------------------------------------------------------------------------------------------------------------------------------------------|---------------------------------------------------------------------------------------------------------------------------------------------------------------------------------------------------------------------------------------------------------------------------------------------------------------------------------------------------------------------------------------------------------------------------------------------------------------------------------------------------------------------------------------------------------------------------------------------------------------------------------------------------------------------------------------------------------------------------|

Figure 1: **LEFT:** LLM prompt for *STAR* dataset **RIGHT:** LLM prompt for *TrafficQA* dataset

## 2 Refinement Prompts

### 2.1 Error Correction

The error correction module queries the LLM two times, one to receive feedback on a program and the other to correct the program given the feedback. The prompts are shown in Figure 2. We display 2 in-context examples for each prompt.

### 2.2 Self-Refinement

The self-refinement module (which we pre-apply to refine our in-context examples) consists of 2 major queries to the LLM. One is for generating a context-free program to avoid hallucinations. Other is to convert the context-free program to a valid program. The prompts are shown in Figure 3

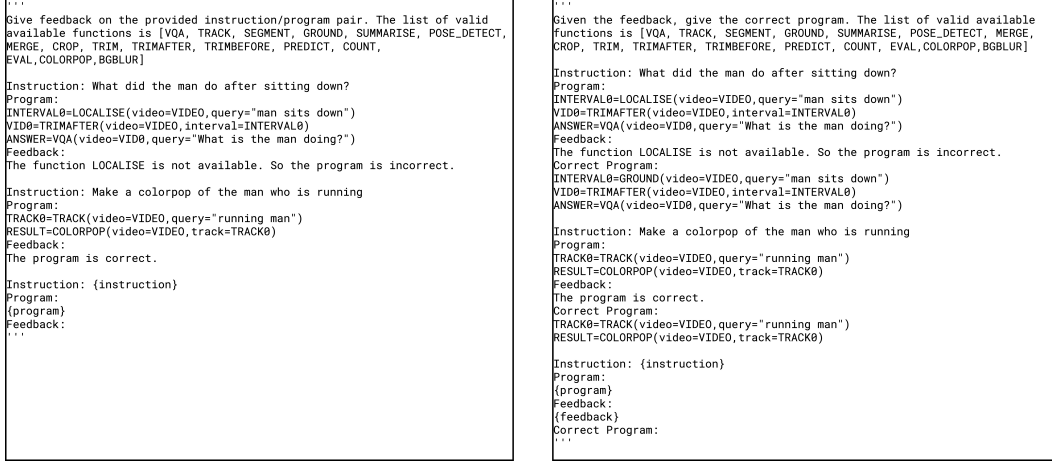

Figure 2: **LEFT:** The prompt for the feedback generation of a given program. **RIGHT:** Given a feedback the correct program is generated by giving this prompt to the LLM.

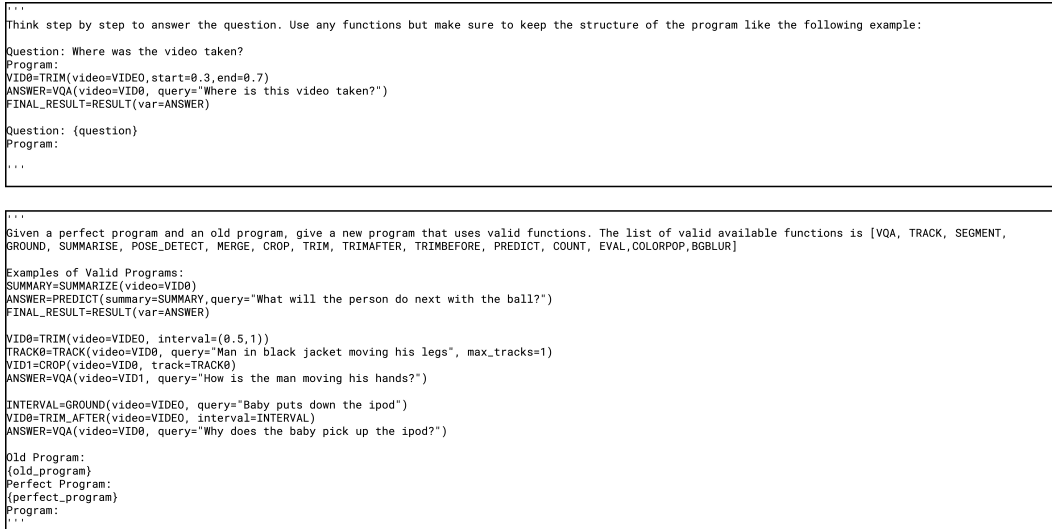

Figure 3: **TOP:** The prompt for the context-free generation. **BOTTOM:** The prompt for aligning a "perfect" program to a valid program

### 3 Ablations

#### 3.1 LLM

We conducted experiments on two datasets (STAR and Social-IQ-2.0) using three additional LLM models for program generation: GPT-4o, CodeLLAMA, and Code-T5. The results, shown in Table 1, indicate that Instruct models excel in program generation due to the task’s instruction-oriented nature. Specifically, CodeLLAMA-7b performed poorly, generating numerous errors likely because it is trained to produce actual code rather than pseudocode-like instructions. Code-T5 failed to generate a correct program altogether, resulting in minimal performance.

#### 3.2 Transcripts

Since the Social-IQ-2.0 dataset contains the transcripts of the videos so we introduce a new function, ANALYSE, tailored for questions aimed at discerning the mood or tone of the video conversation. This function involves querying a Language Model (LLM) with the transcript, and, in some instances,

Table 1: *Comparison with multiple LLMs*, both open source models and other GPT model versions.

| LLM                                      | STAR  | Social-IQ-2.0 |
|------------------------------------------|-------|---------------|
| <b>GPT-3.5-turbo-instruct (original)</b> | 47.2% | 51.6%         |
| <b>GPT-4</b>                             | 43.5% | 49.1%         |
| <b>CodeLlama-7b</b>                      | 10.0% | 5.0%          |
| <b>CodeLlama-7b-Instruct</b>             | 42.3% | 48.4%         |
| <b>Code-T5</b>                           | 0%    | 0%            |

Table 2: *Effect of using transcripts from the Social-IQ QA dataset.*

| Dataset       | Baseline | With transcripts |
|---------------|----------|------------------|
| Social-IQ-2.0 | 48.1%    | 51.6%            |

the appended summary along with the posed question. Our analysis includes performance metrics for both scenarios i.e., employing transcripts and not using them (Table 2).

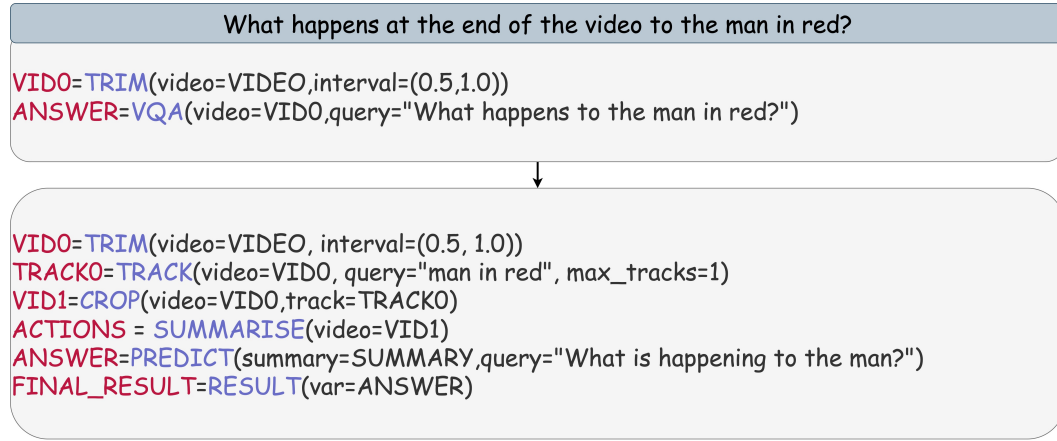

Figure 4: An example of the self refinement module. An initially generated prompt is refined by the LLM to produce a more complex and modular program.

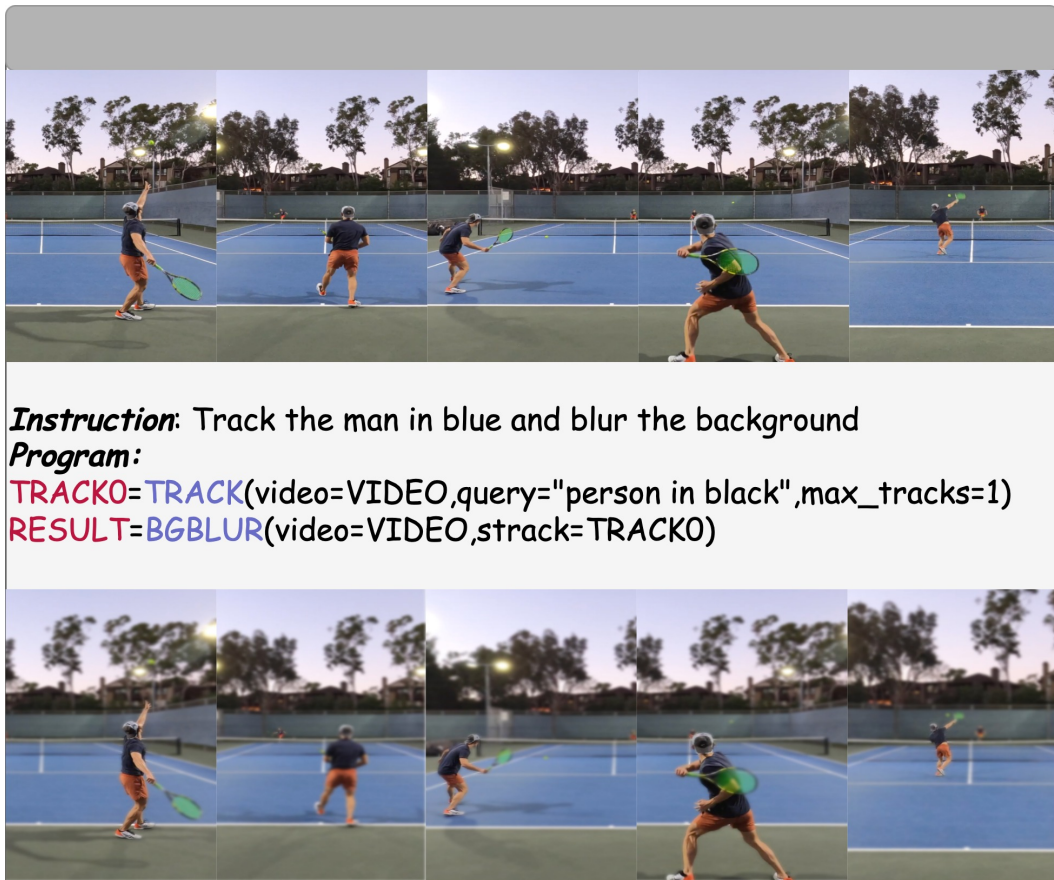

Figure 5: A qualitative example of video-editing using VURF.



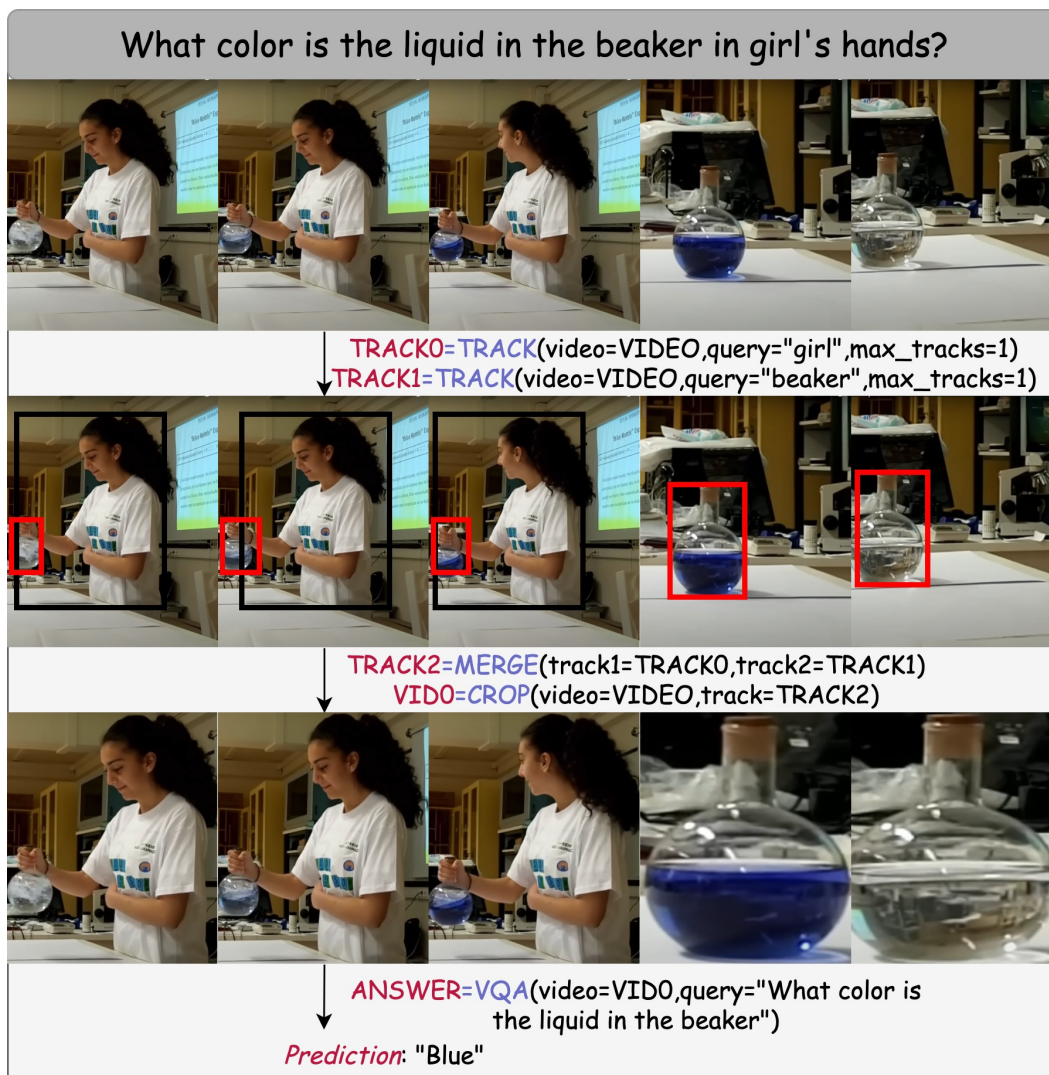

Figure 6: A step by step qualitative example of Video Question Answering using VURF.
